# Supplementary material for: Rapid assessment of the gate function and membrane properties of connexin-embedded giant plasma membrane vesicles in a microwell array
Source: Royal Society of Chemistry journal article supplement (doi:10.1039/d5an00036j), 2025-01-01
Supplement: d5an00036j1.pdf [file d5an00036j1.pdf]

## Supporting Information

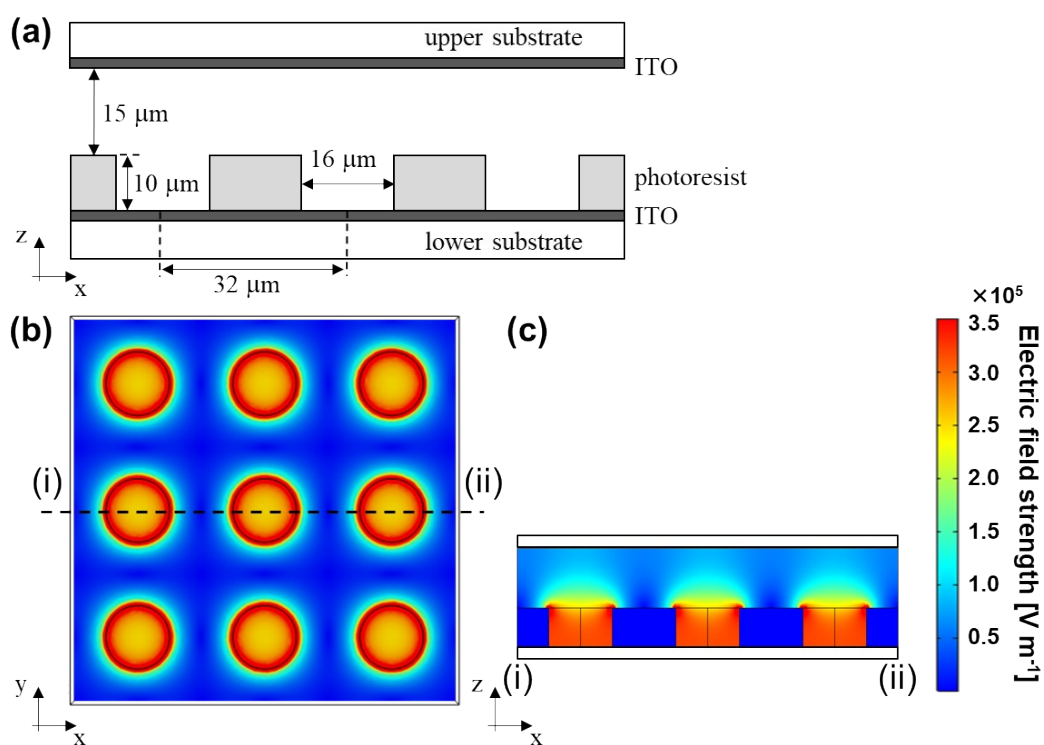

Figure S1. (a) Cross-sectional schematic of the microwell array electrode device. The distribution of the calculated electric field strength in the microwell array electrode device in (b) the x-y plane 10  $\mu\text{m}$  above the bottom of microwells and (c) the x-z plane through the centers of microwells along the line (i)-(ii) in Fig. S1(b).

## S2 Calculation of the real part of CM factors

The DEP force acting on dielectric spherical particles with radius  $R$  and permittivity  $\epsilon_p$ , suspended in a medium with permittivity  $\epsilon_M$  under an electric field gradient  $\nabla E$ , can be described as follows<sup>1</sup>:

$$F_{DEP} = 2\pi\epsilon_M R^3 \text{Re}[K(\omega)] |\nabla E|^2 \quad (S1)$$

where  $K(\omega)$  is the Clausius-Mossotti (CM) factor and given as follows:

$$K(\omega) = \frac{\epsilon_p^* - \epsilon_M^*}{\epsilon_p^* + 2\epsilon_M^*} \quad (S2)$$

Here,  $\epsilon_p^*$  and  $\epsilon_M^*$  are the complex permittivity of the particle and the medium, respectively. These complex permittivities are written as:

$$\epsilon^* = \epsilon - j \frac{\sigma}{\omega} \quad (S3)$$

in which  $\sigma$  is the conductivity,  $j$  is the imaginary unit, and  $\omega$  is the angular frequency, which is related to the applied frequency,  $f$ , by  $\omega = 2\pi f$ .

The single-shell model that contains a homogeneous core (cytoplasm) and an outer shell (cell membrane) was used to express the complex permittivity of cells. When this model is applied to a cell with radius  $R$ , membrane thickness  $d$ , complex permittivity of the cytoplasm  $\epsilon_c^*$ , and complex permittivity of the membrane  $\epsilon_m^*$  (Fig. S2(a)), it results in a complex effective permittivity of the entire

cell,  $\epsilon_p^{eff*}$ , written as follows:

$$\epsilon_p^{eff*} = \frac{(\epsilon_c^* + 2\epsilon_m^*)R^3 - 2(\epsilon_m^* - \epsilon_c^*)(R-d)^3}{(\epsilon_c^* + 2\epsilon_m^*)R^3 + (\epsilon_m^* - \epsilon_c^*)(R-d)^3} \epsilon_m^* \quad (S4)$$

In situations where  $R \gg d$ , as in mammalian cells,  $\epsilon_m$  can be written as follows:

$$\epsilon_m = C_m d \quad (S5)$$

where  $C_m$  is the membrane capacitance. As shown here,  $C_m$  and  $R$  influence the CM factor and shift the DEP spectrum (Figs. S2(b) and (c)).

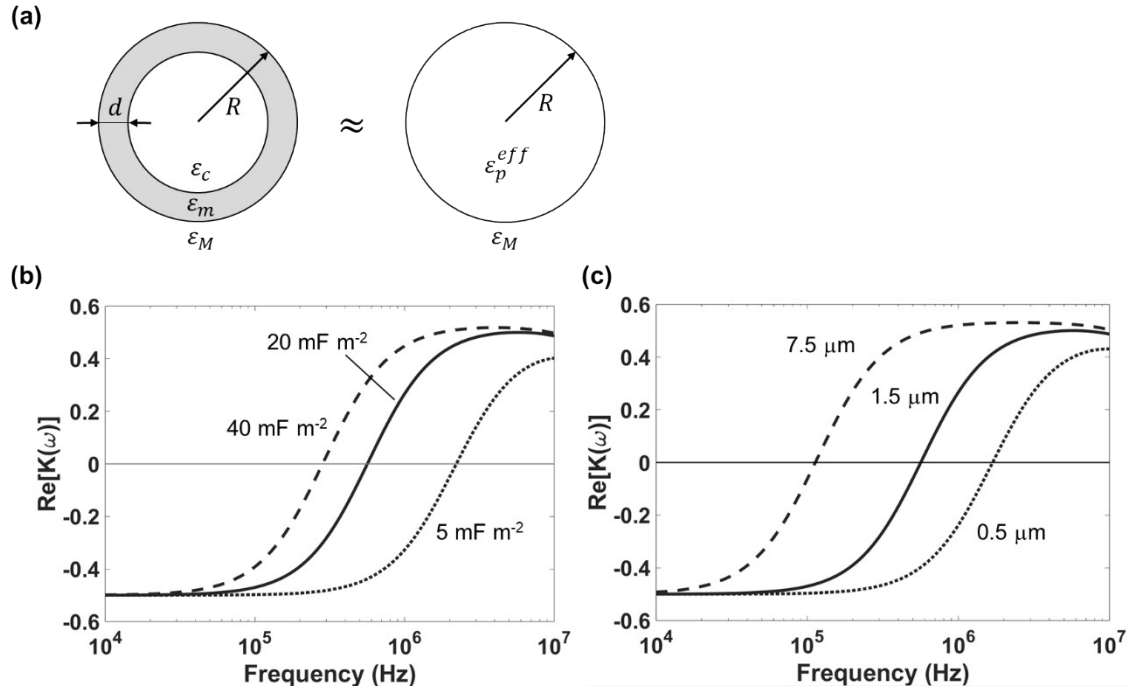

Figure S2. (a) Schematic illustration of single-shell model. (b, c) Calculated results for the real part of the Clausius-Mossotti factor of single-shell particle with membrane thickness  $d = 7$  nm, cytoplasm permittivity  $\epsilon_c = 60 \epsilon_0$ , cytoplasm conductivity  $\sigma_c = 360$  mS  $m^{-1}$ , medium permittivity  $\epsilon_M = 78 \epsilon_0$ , medium conductivity  $\sigma_M = 80$  mS  $m^{-1}$ , (b) radius  $R = 1.5 \mu m$ , membrane capacitance  $C_m = 5, 20, 40$  mF  $m^{-2}$ , (c)  $R = 0.5, 1.5, 7.5$  mm,  $C_m = 20$  mF  $m^{-2}$  at various frequencies.

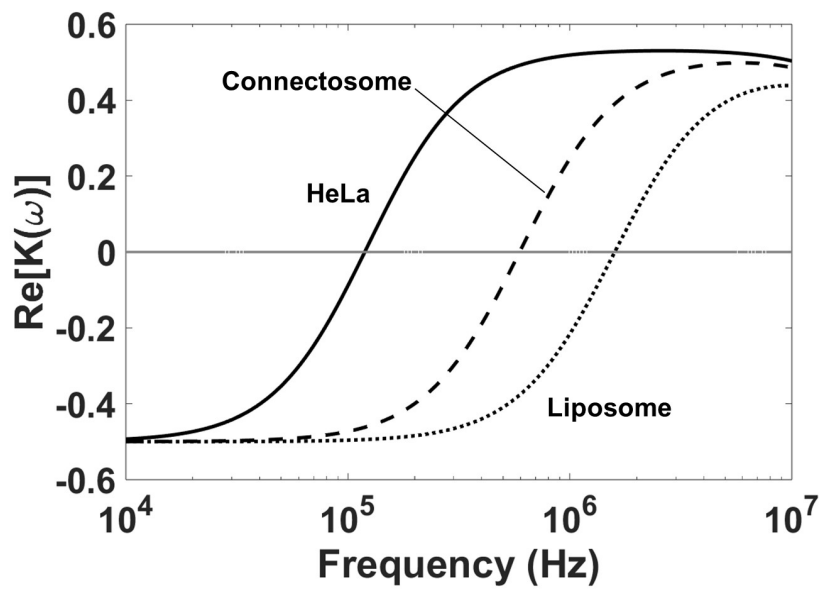

Figure S3. Calculated results for the real part of the Clausius-Mossotti factor of HeLa cells, Connectosomes, and Liposomes at various frequencies.

|            | medium<br>permittivity<br>$\epsilon_M$<br>(F m <sup>-1</sup> ) | medium<br>conductivity<br>$\sigma_M$<br>(mS m <sup>-1</sup> ) | cytoplasm<br>permittivity<br>$\epsilon_c$<br>(F m <sup>-1</sup> ) | cytoplasm<br>conductivity<br>$\sigma_c$<br>(S m <sup>-1</sup> ) | membrane<br>capacitance<br>$C_m$<br>(mF m <sup>-2</sup> ) | radius<br>$R$<br>( $\mu$ m) |
|------------|----------------------------------------------------------------|---------------------------------------------------------------|-------------------------------------------------------------------|-----------------------------------------------------------------|-----------------------------------------------------------|-----------------------------|
| HeLa cells | $78 \epsilon_0$                                                | 80                                                            | $60 \epsilon_0$                                                   | 0.36                                                            | 19                                                        | 7.5                         |
| Liposomes  | $78 \epsilon_0$                                                | 80                                                            | $78 \epsilon_0$                                                   | 0.36                                                            | 7.5                                                       | 1.5                         |

Table S1. Clausius-Mossotti parameters for HeLa cells and liposomes.

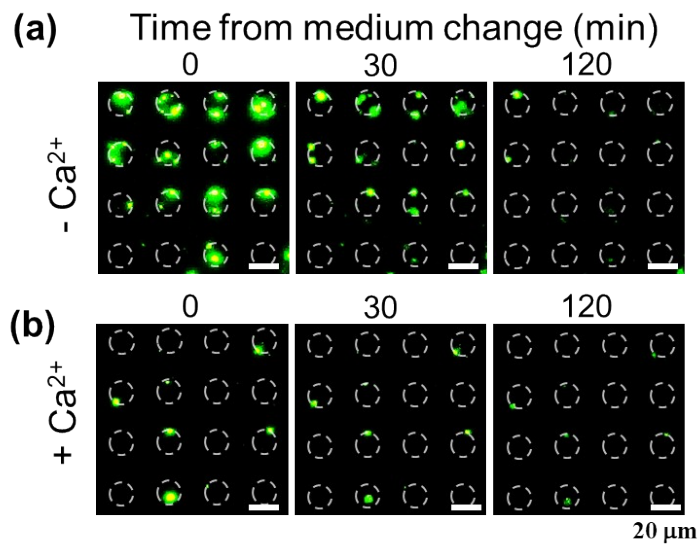

Figure S4. Fluorescence images of GPMVs trapped in microwells in (a) the absence and (b) the presence of  $\text{Ca}^{2+}$ .

1. “*Dielectrophoresis*”, 2017, John Wiley & Sons, Ltd, 1.
